# Supplementary material
Source: PubMed Central journal article supplement (PMC1584284)
Supplement: NIHMS12226-supplement-Figs.pdf [file NIHMS12226-supplement-Figs.pdf]

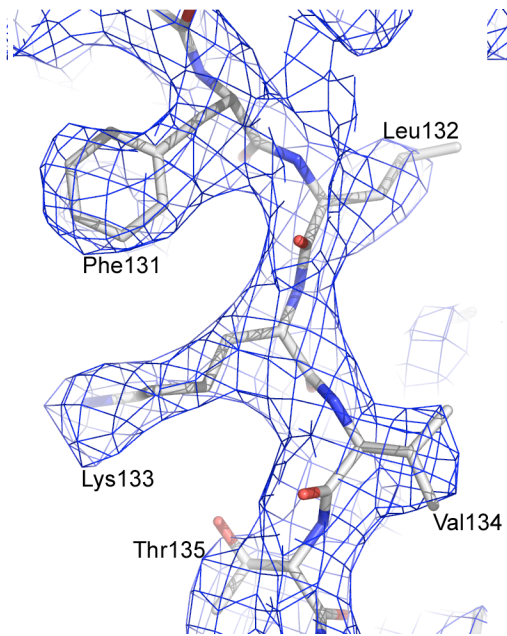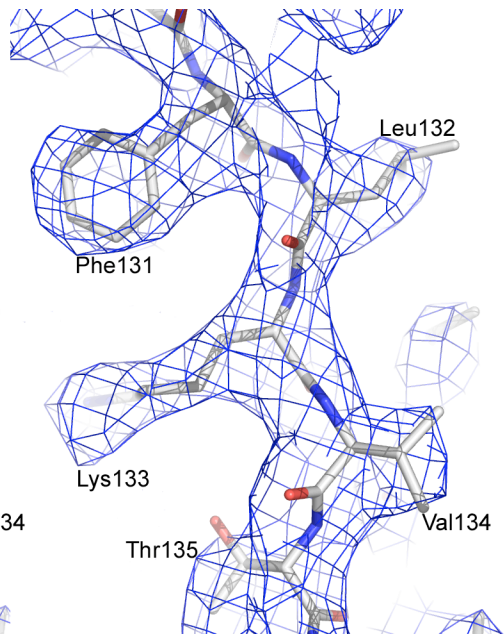

**Supplementary Figure 1. Electron density.** Stereoview of electron density from the solvent-flattened combined MAD and SIR Fourier synthesis, contoured at 1.0  $\sigma$  and superimposed on the final refined structure.

**a**

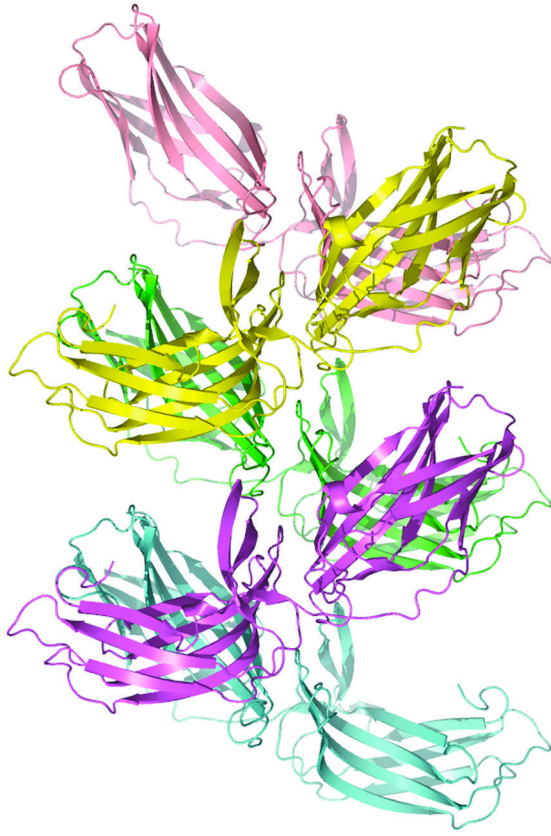

**b**

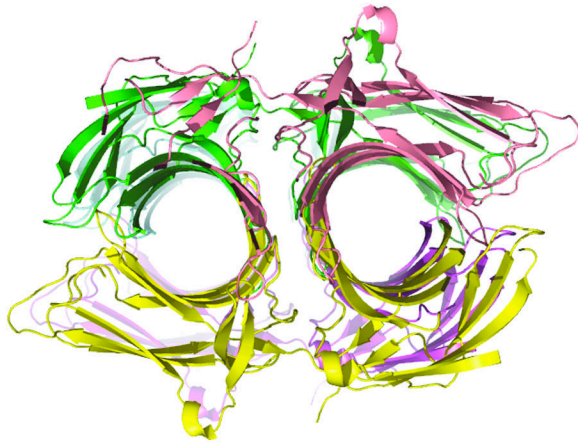

**Supplementary Figure 2. Crystal packing.** Crystals of Vps26 contain tubes that run the length of the crystal.
